# Supplementary material for: Recent progress of ICP-MS in the development of metal-based drugs and diagnostic agents
Source: Royal Society of Chemistry journal article supplement (doi:10.1039/c3ja50394a), 2014-01-01
Supplement: c3ja50394a1.pdf [file c3ja50394a1.pdf]

**Table S-1** Summary of most important recent review work relevant to the subject of the present review

| Title                                                                                                                                                          | Reference                                                                                                                               |
|----------------------------------------------------------------------------------------------------------------------------------------------------------------|-----------------------------------------------------------------------------------------------------------------------------------------|
| Technical aspects of inductively coupled plasma bioanalysis techniques                                                                                         | J. Ammerman, C. Huang, J. Sailstad et al., <i>Bioanalysis</i> , 2013, <b>5</b> , 1831–1841                                              |
| Anticancer metallodrug research analytically painting the “omics” picture – current developments and future trends                                             | M. Groessl and C. G. Hartinger, <i>Anal. Bioanal. Chem.</i> , 2013, <b>405</b> , 1791–1808                                              |
| Mass spectrometry for the characterisation of nanoparticles                                                                                                    | A.R. Montoro Bustos, J. R. Encinar and A. Sanz-Medel, <i>Anal. Bioanal. Chem.</i> , 2013, <b>405</b> , 5637–5643                        |
| Metallomics: An integrated biometal science                                                                                                                    | R. G. Ge and H. Z. Sun, <i>Sci. China B</i> , 2009, <b>52</b> , 2055–2070                                                               |
| Platinum speciation used for elucidating activation or inhibition of Pt-containing anti-cancer drugs                                                           | B. Michalke, <i>J. Trace Elem. Med. Biol.</i> , 2010, <b>24</b> , 69–77                                                                 |
| Liquid chromatography-inductively coupled plasma-based metallomic approaches to probe health-relevant interactions between xenobiotics and mammalian organisms | J. L. Gomez-Ariza, E. Z. Jahromi, M. González-Fernández, T. Garcia-Barrera and J. Gailer, <i>Metallomics</i> , 2011, <b>3</b> , 566–577 |
| Element speciation analysis using capillary electrophoresis: twenty years of development and applications                                                      | A.R. Timerbaev, <i>Chem. Rev.</i> , 2013, <b>113</b> , 778–812                                                                          |
| Laser ablation ICP-MS for quantitative biomedical applications                                                                                                 | I. Konz, B. Fernández, M. L. Fernández, R. Pereiro and A. Sanz-Medel, <i>Anal. Bioanal. Chem.</i> , 2012, <b>403</b> , 2113–2125        |
